# Supplementary material for: Evaluation of 10-Nitro Oleic Acid Bio-Elimination in Rats and Humans
Source: PubMed Central journal article supplement (PMC5215368; doi:10.1038/srep39900), 2017-01-05
Supplement: srep39900-s1.pdf [file srep39900-s1.pdf]

## Supplementary Material

### EVALUATION OF 10-NITRO OLEIC ACID BIO-ELIMINATION IN RATS AND HUMANS

Sonia R. Salvatore<sup>1</sup>, Dario A. Vitturi<sup>1</sup>, Marco Fazzari<sup>1,2</sup>, Diane K. Jorkasky<sup>3</sup> and Francisco J. Schopfer<sup>1</sup>

<sup>1</sup>Department of Pharmacology and Chemical Biology, University of Pittsburgh, Pittsburgh, PA 15261, USA. <sup>2</sup>Fondazione Ri.MED, Palermo, 90133, Italy. <sup>3</sup>Complexa Inc., Pittsburgh, PA, 15203, USA.

#### **\*Running title: Nitro-Fatty Acid Urinary Metabolites**

To whom correspondence may be addressed: Francisco J. Schopfer, Ph.D., Department of Pharmacology & Chemical Biology, Thomas E. Starzl Biomedical Science Tower E1343, 200 Lothrop St, University of Pittsburgh, Pittsburgh, PA 15213, USA; Tel: (412) 648-0193; Fax: (412) 648-2229; Email: fjs2@pitt.edu.

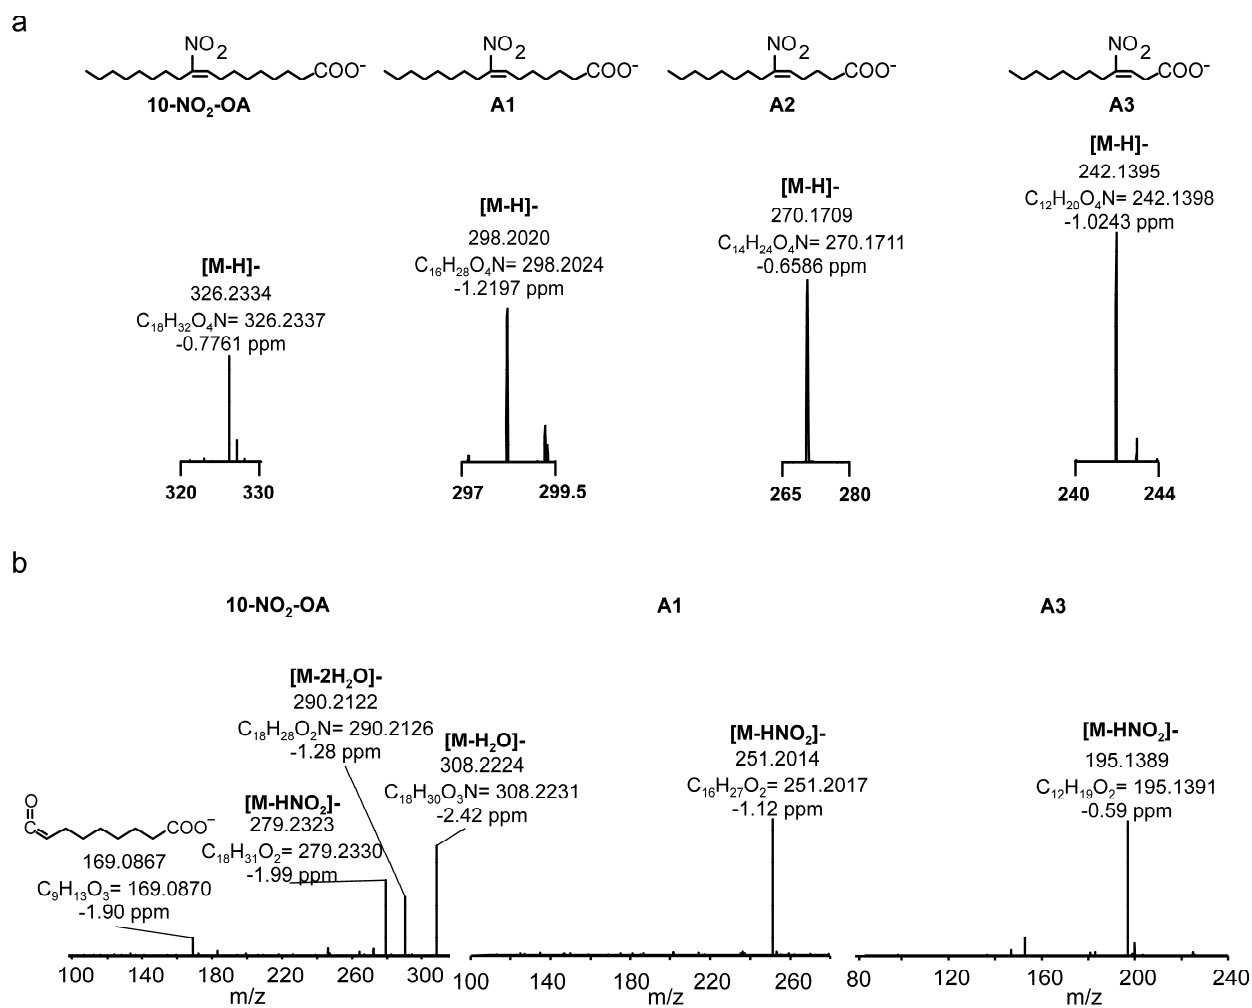

**Supplementary Fig 1 a)** Structures and corresponding high resolution MS analysis of 10-NO<sub>2</sub>-OA and its β-oxidation metabolites (A1 to A3), **b)** MS/MS analysis for 10-NO<sub>2</sub>-OA, A1 and A3 metabolites.
